# Supplementary material for: Intratumoral heterogeneity as a predictive biomarker in anti-PD-(L)1 therapies for non-small cell lung cancer
Source: PubMed Central journal article supplement (PMC7901210; doi:10.1186/s12943-021-01331-9), 2021-02-23
Supplement: 12943_2021_1331_MOESM2_ESM.pdf [file 12943_2021_1331_MOESM2_ESM.pdf]

## Supplementary Figures

Fig. S1.

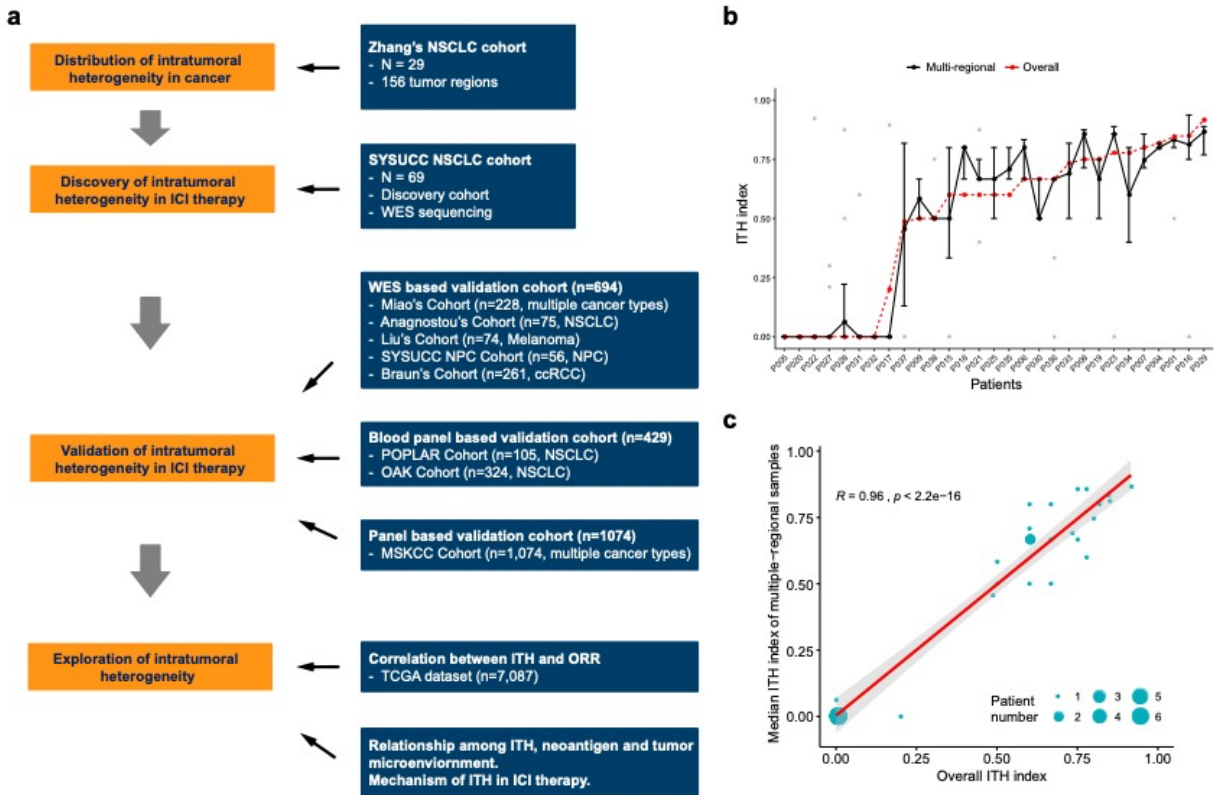

**Fig. S1. Study diagram and Intratumoral heterogeneity concept. a**, the study diagram. **b-c**, Intratumoral heterogeneity (ITH) measured from local sampling could be representative of the overall tumor.

**Fig. S2.**

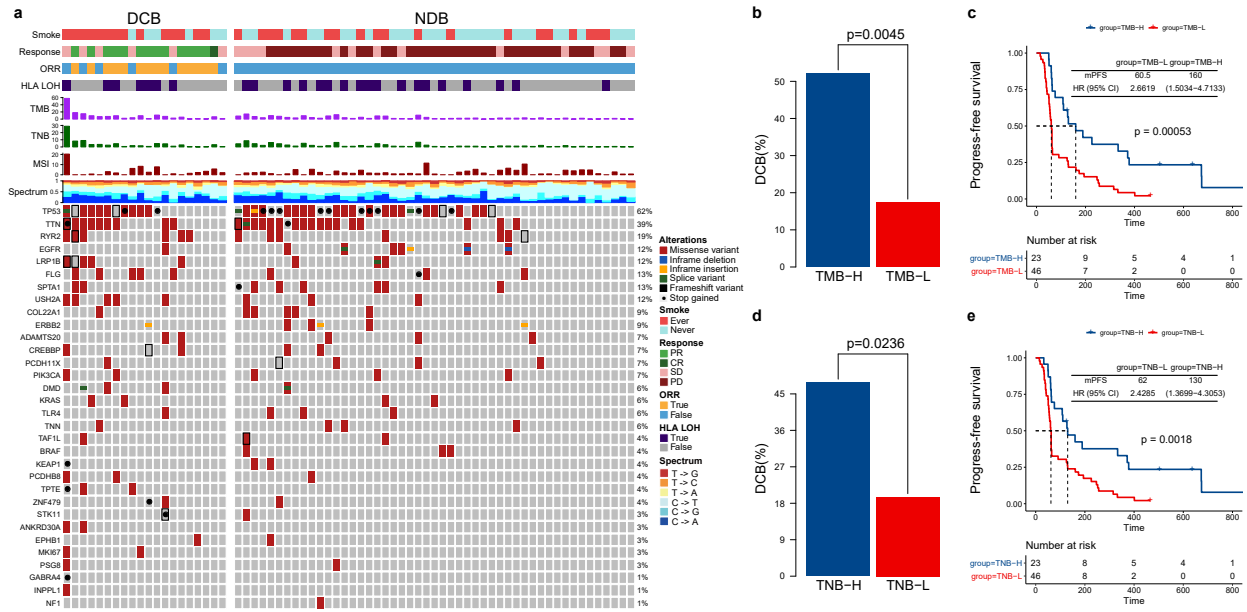

**Fig. S2. Mutation landscape and the association between tumor mutation/ neoantigen**

**burden and clinical outcome in SYSUCC NSCLC cohort. a**, mutation landscape of SYSUCC NSCLC cohort. Top tracks, indication of smoking status, clinical outcome and type I HLA loss of heterogeneity (LOH) status of each patient. Top histogram, tumor mutation burden (TMB), tumor neoantigen burden (TNB) and microsatellite instability (MSI) values of each patient, and mutation spectrum of each patient. Center heatmap, distribution of non-synonymous driver mutation events; right annotation, frequency of somatic alterations. Patients were divided into durable clinical benefit (DCB) group and non-durable clinical benefit (NDB) group. **b**, barplot of durable clinical benefit rate between TMB-H group and TMB-L group. **c**, TMB-H is associated with better progression-free survival. **d**, barplot of durable clinical benefit rate between TNB-H group and TNB-L group. **e**, TNB-H is associated with better progression-free survival.

Fig. S3.

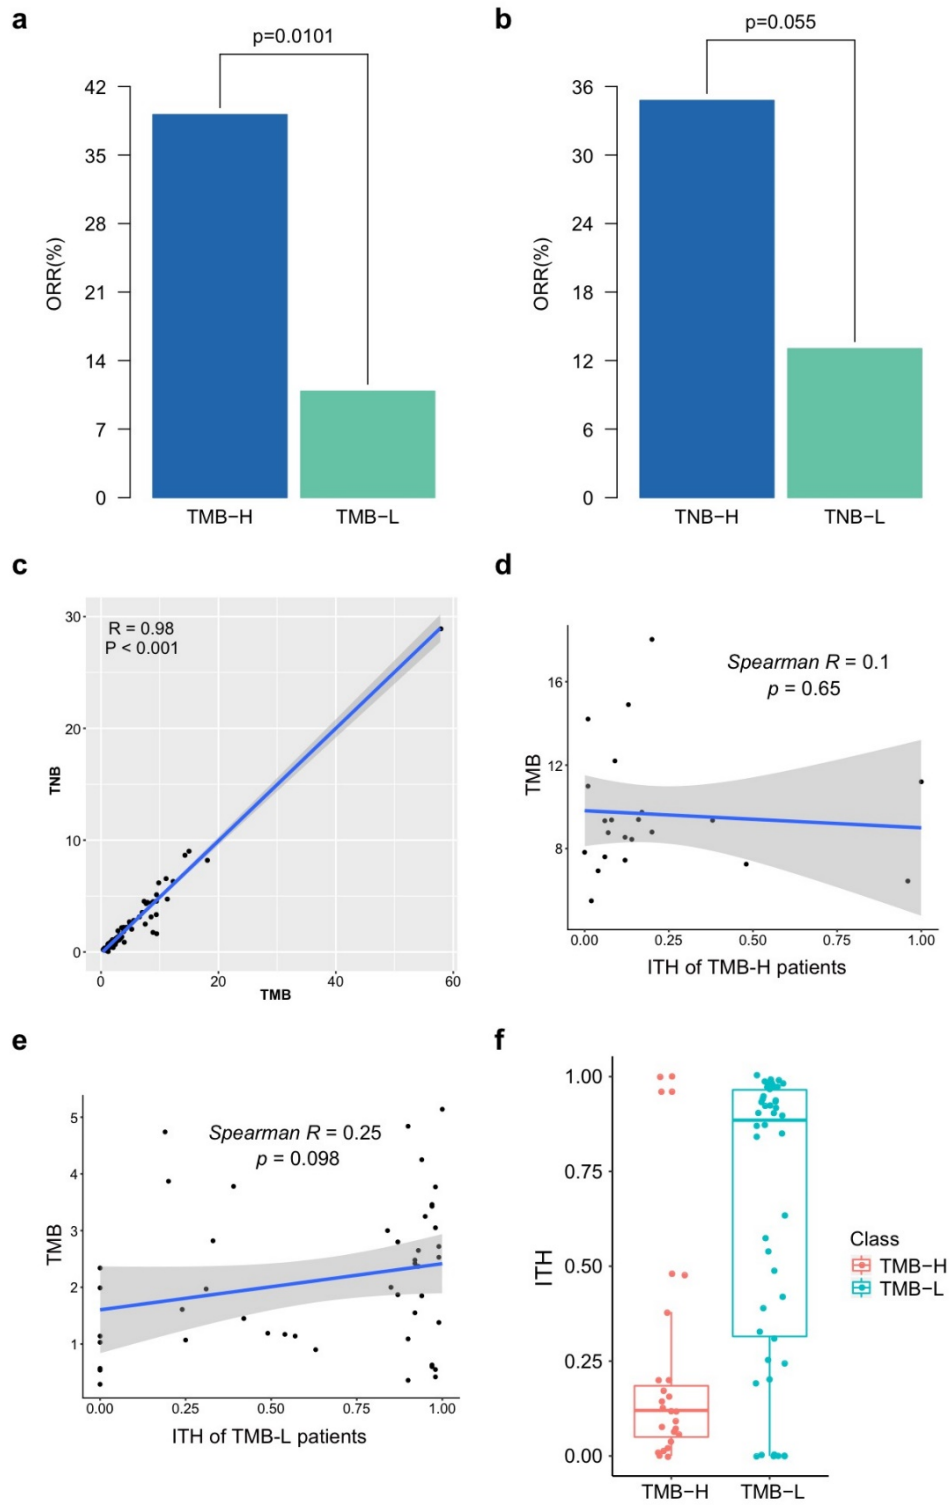

**Fig. S3. Analysis of the biomarkers in SYSUCC NSCLC cohort.** **a**, Barplot of objective response rate between different TMB groups. **b**, Barplot of objective response rate between different TNB groups. **c**, Correlation between TMB and TNB. **d**, Correlation between ITH and TMB in TMB-H subgroup. **e**, Correlation between ITH and TMB in TMB-L subgroup. **f**, Distribution of ITH in TMB-H group and TMB-L group.

**Fig. S4.**

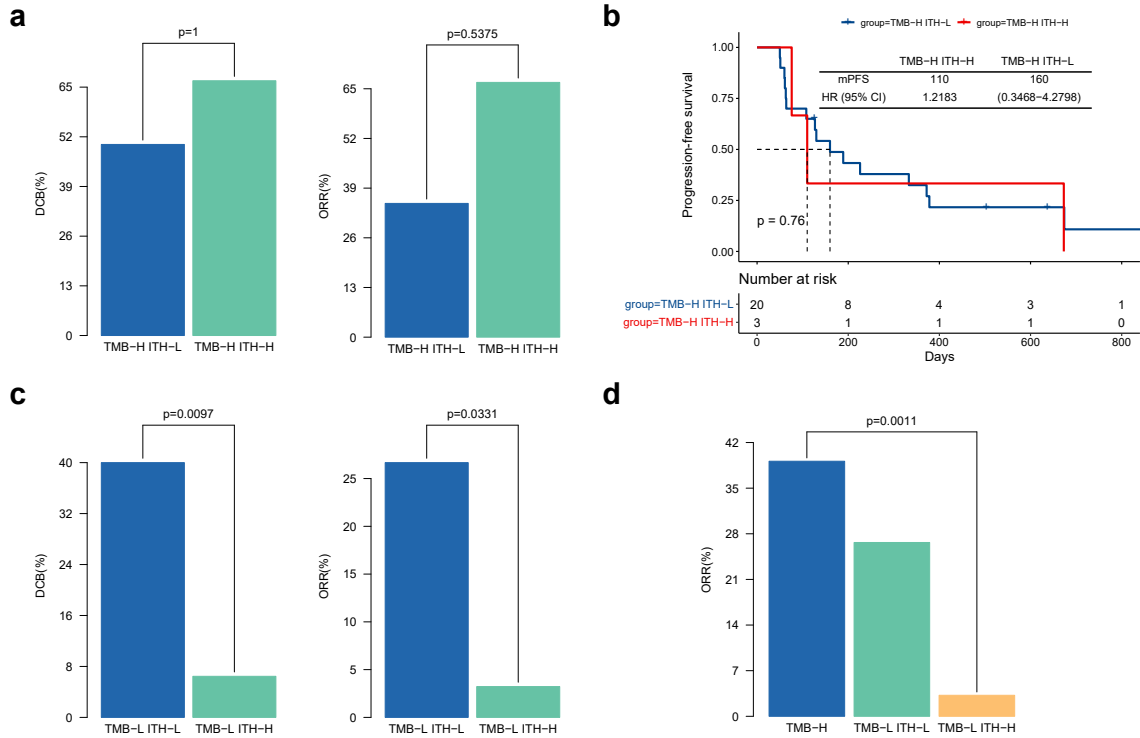

**Fig. S4. Association between TMB/ITH and clinical outcomes in SYSUCC NSCLC cohort.**

**a**, Barplot of durable clinical benefit rate (left) and objective response rate (right) between ITH-L and ITH-H in TMB-H subgroup. **b**, Progression-free survival plot of different ITH level in TMB-H subgroup. **c**, Barplot of durable clinical benefit rate (left) and objective response rate (right) between ITH-L and ITH-H in TMB-L subgroup. **d**, Objective response rate among TMB-H, TMB-L&ITH-L and TMB-L&ITH-H three groups.

**Fig. S5.**

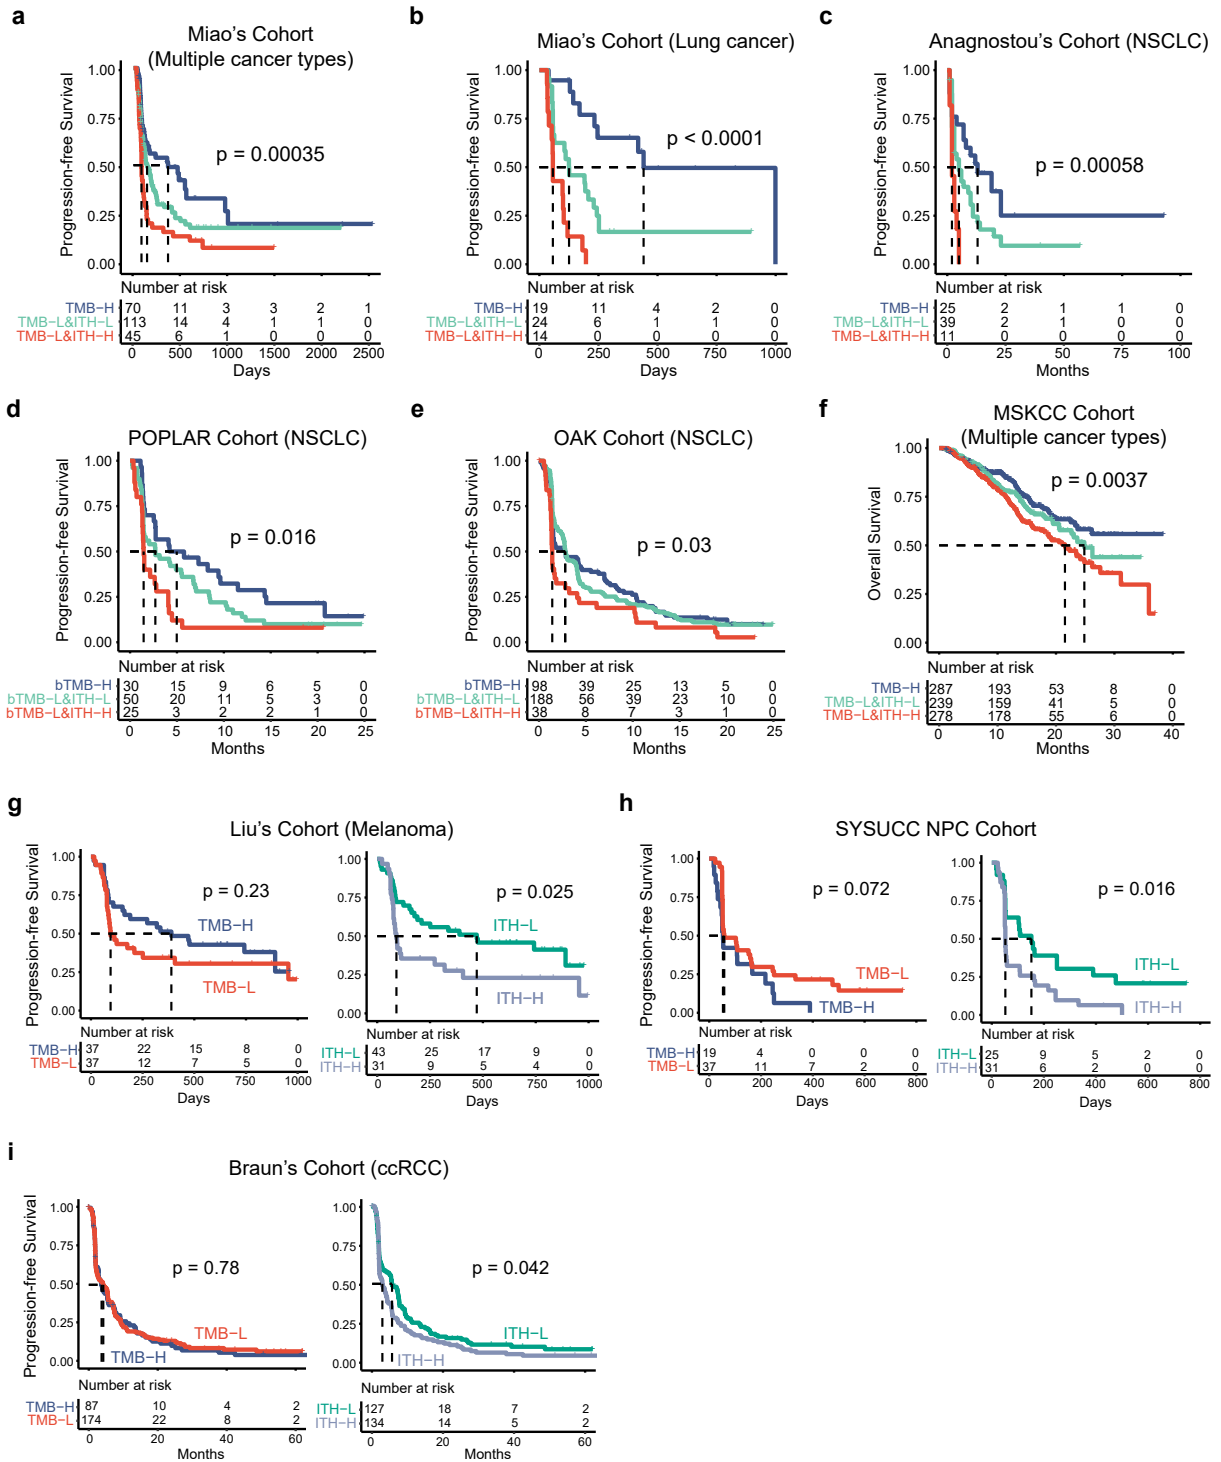

**Fig. S5. Validation of intratumoral heterogeneity and tumor mutation burden in predicting clinical outcome of immunotherapy in multiple cohorts. a-e**, progression-free survival plot among three groups of TMB-H, TMB-L&ITH-L and TMB-L&ITH-H in Miao cohort (**a**), Miao lung cancer cohort (**b**), Anagnostou cohort (**c**), POPLAR cohort (**d**) and OAK cohort (**e**). **f**, overall survival plot among three groups of TMB-H, TMB-L&ITH-L and TMB-L&ITH-H in MSKCC cohort. **g-i**, TMB is not associated with clinical outcome but ITH still can predict the efficacy of immunotherapy in Liu cohort (**g**), SYSUCC NPC cohort (**h**) and Braun cohort (**i**).

**Fig. S6.**

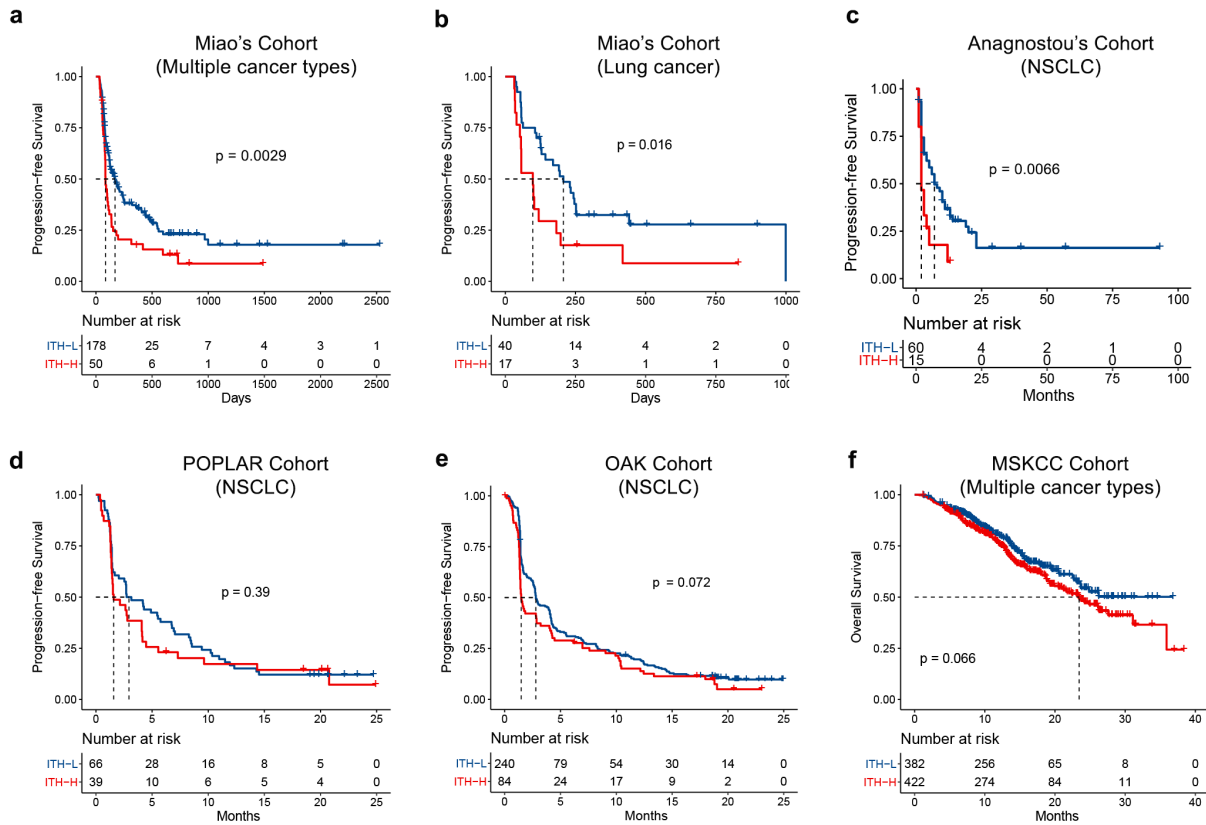

**Fig. S6. Validation of intratumoral heterogeneity in predicting clinical outcome of immunotherapy in multiple cohorts. a-e**, progression-free survival plot among three groups of ITH-L and ITH-H in Miao cohort (a), Miao lung cancer cohort (b), Anagnostou cohort (c), POPLAR cohort (d) and OAK cohort (e). **f**, overall survival plot among ITH-L and ITH-H in MSKCC cohort.



**Fig. S7.**

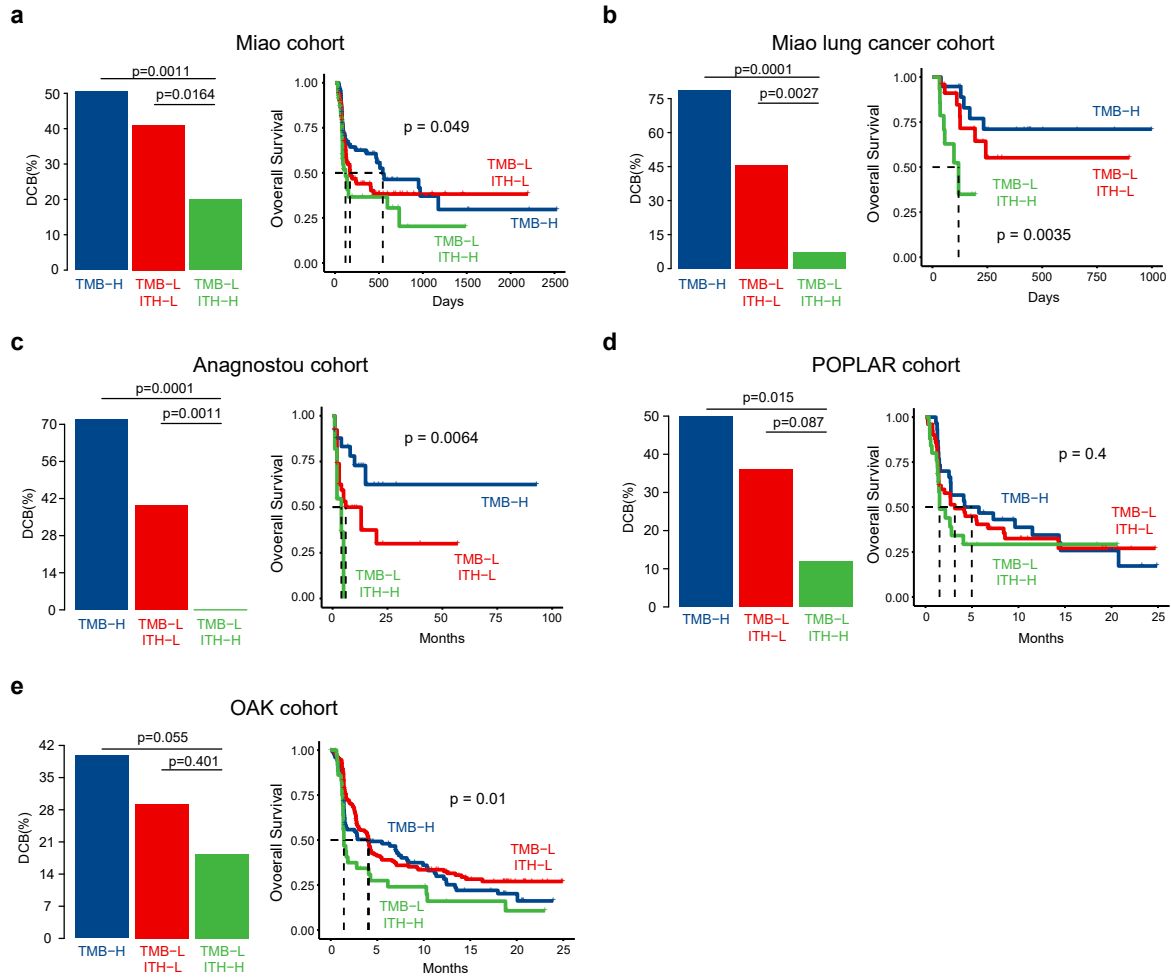

**Fig. S7. Durable clinical benefit rate and overall survival of combination of ITH and TMB in validation cohorts. a-e,** Barplot of durable clinical benefit rate and overall survival among TMB-H, TMB-L&ITH-L and TMB-L&ITH-H three groups in Miao cohort (a), Miao lung cancer cohort (b), Anagnostou cohort (c), POPLAR cohort (d) and OAK cohort (e).

**Fig. S8.**

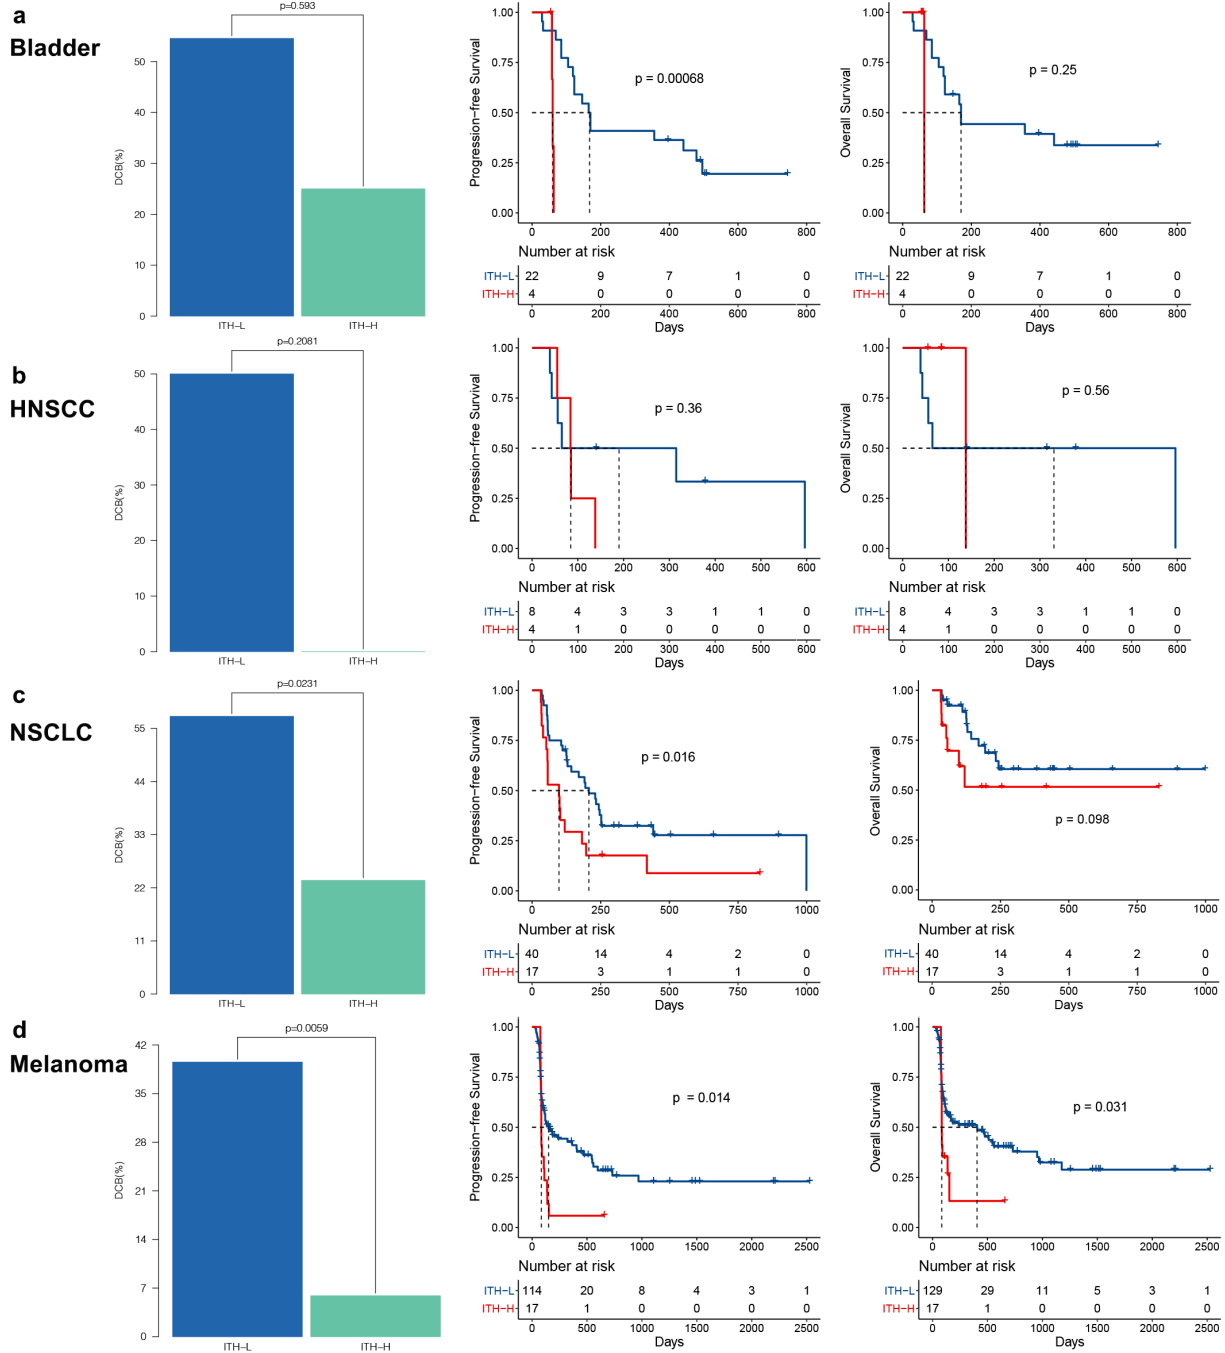

**Fig. S8. Intratumoral heterogeneity in predicting clinical outcome of immunotherapy in multiple cancer types (Miao cohort). a-d, Bladder cancer (a), HNSCC (b), NSCLC (c), Melanoma (d).**

**Fig. S9.**

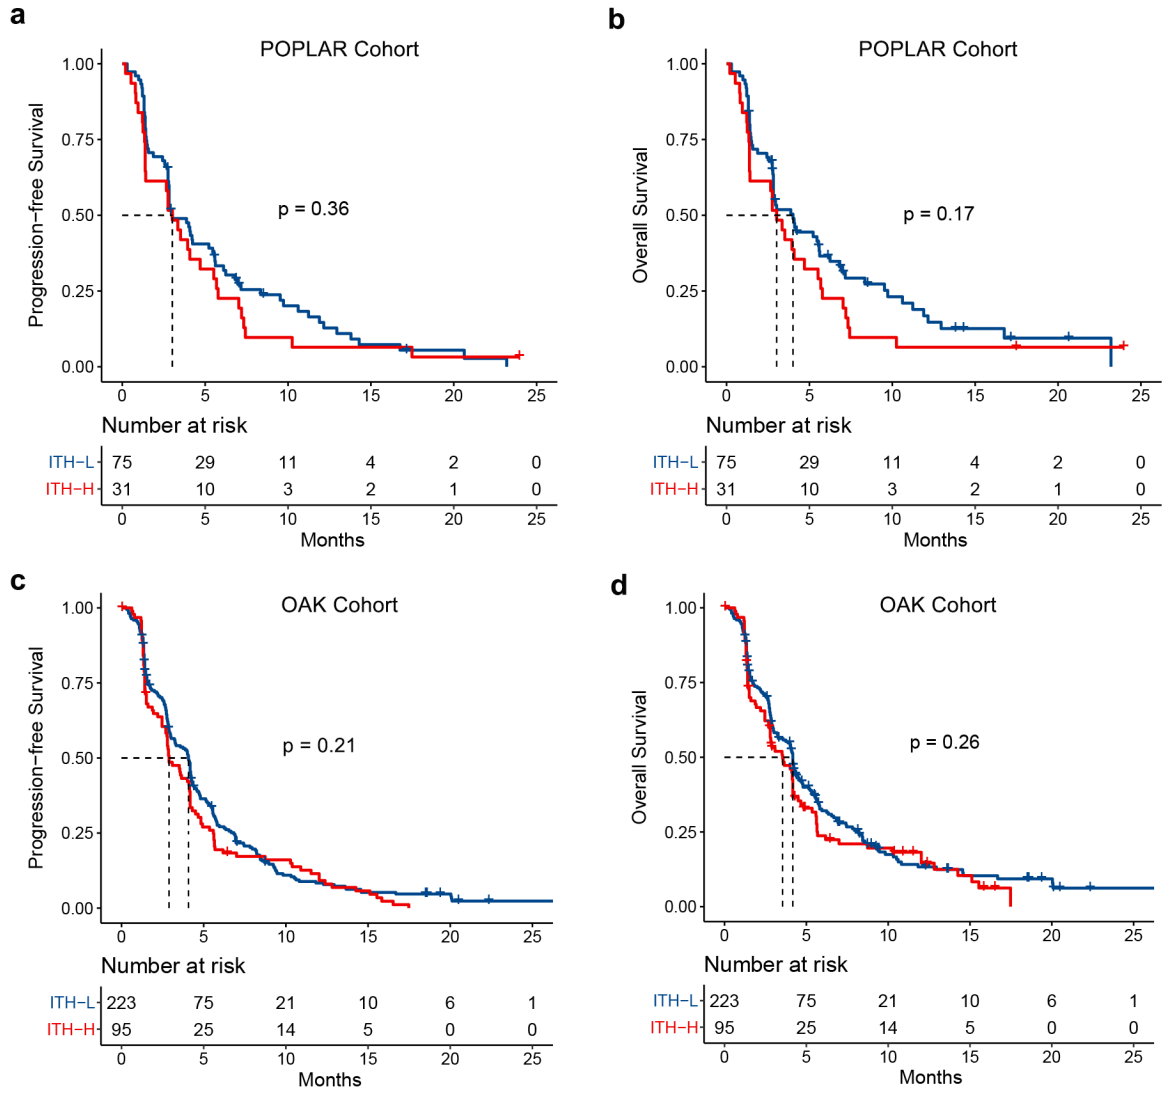

**Fig. S9. Intratumoral heterogeneity in predicting clinical outcome of chemotherapy in POPLAR/OAK cohort.**

Fig. S10.

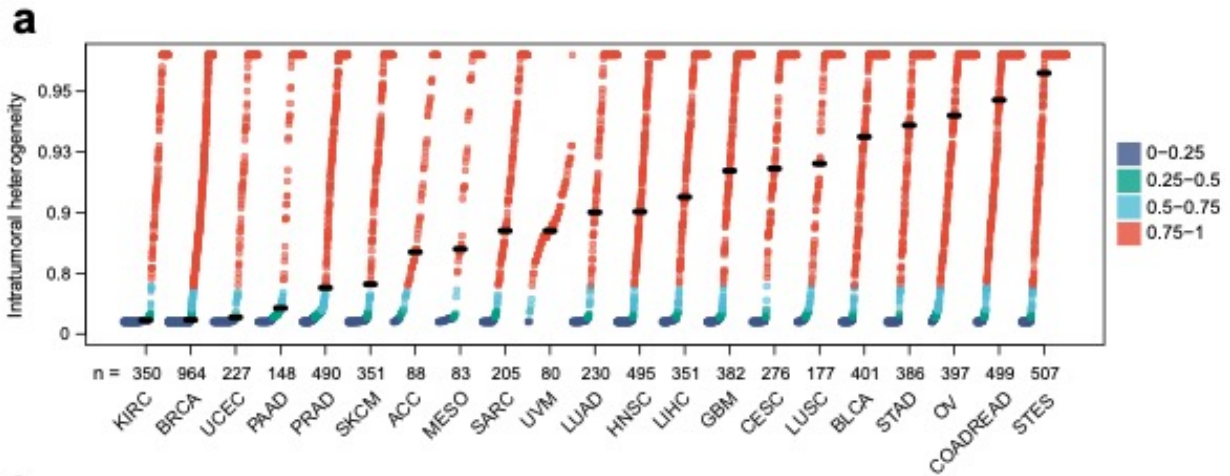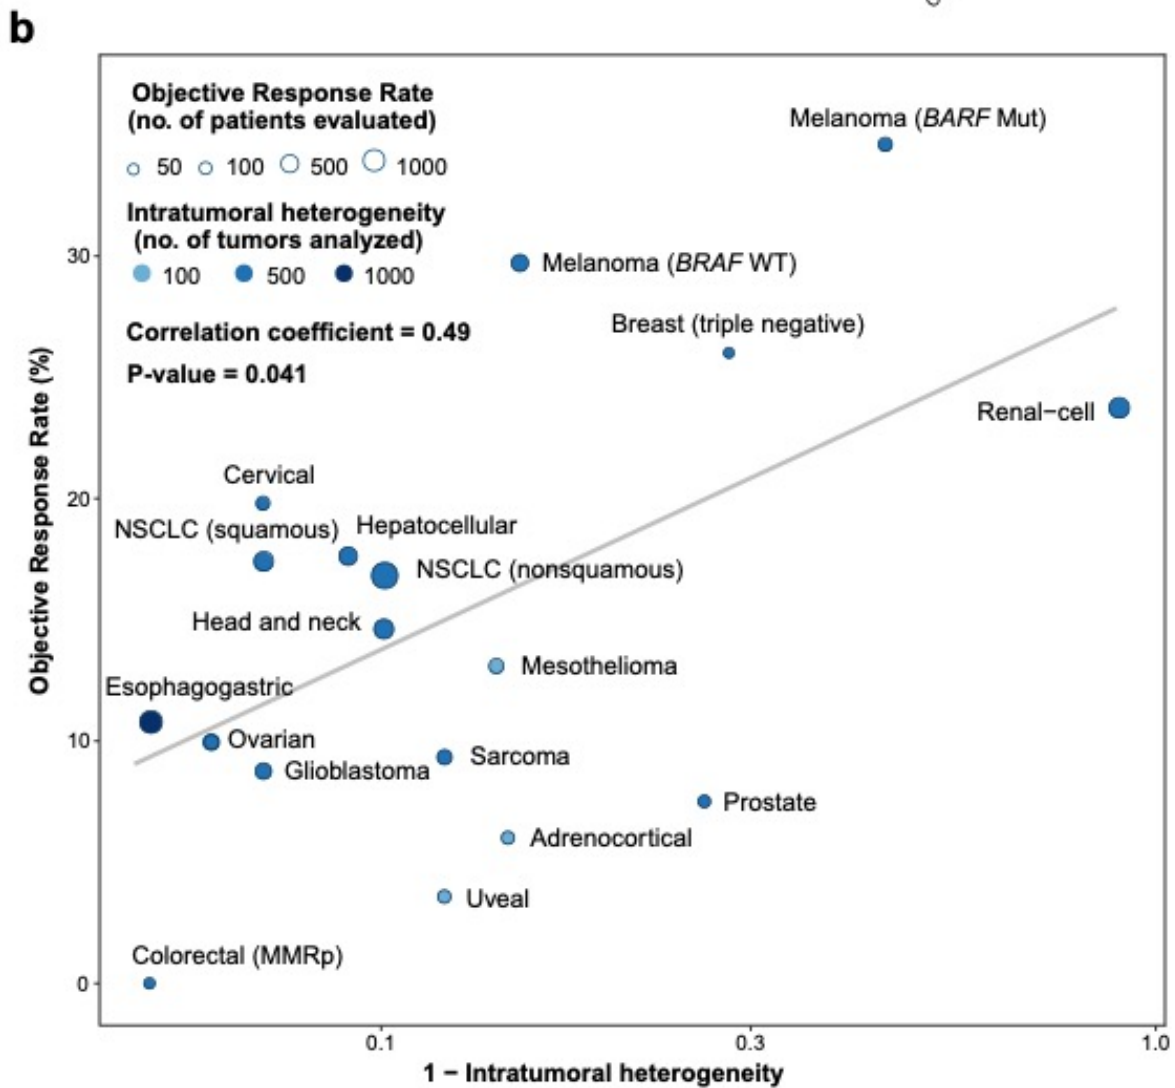

**Fig. S10. Association between intratumoral heterogeneity and objective response rate with immunotherapy across multiple cancer types.** **a**, distribution of ITH among 21 cancer types from TCGA dataset. Data on the y axis are shown on a logarithmic scale. Median ITH of each cancer type is label in black and is rank in descending order. **b**, Correlation between intratumoral heterogeneity and objective response rate with immunotherapy in 17 cancer types. The number of patients who were evaluated for the objective response rate is shown for each tumor type (size of the circle), along with the number of tumor samples that were analyzed to calculate the ITH (degree of shading of the circle). Data on the x axis are shown on a logarithmic scale. MMRp denotes mismatch repair-proficient, NSCLC non–small-cell lung cancer, *BRAF* WT *BRAF* wild type, and *BRAF* Mut *BRAF* mutant type.

**Fig. S11.**

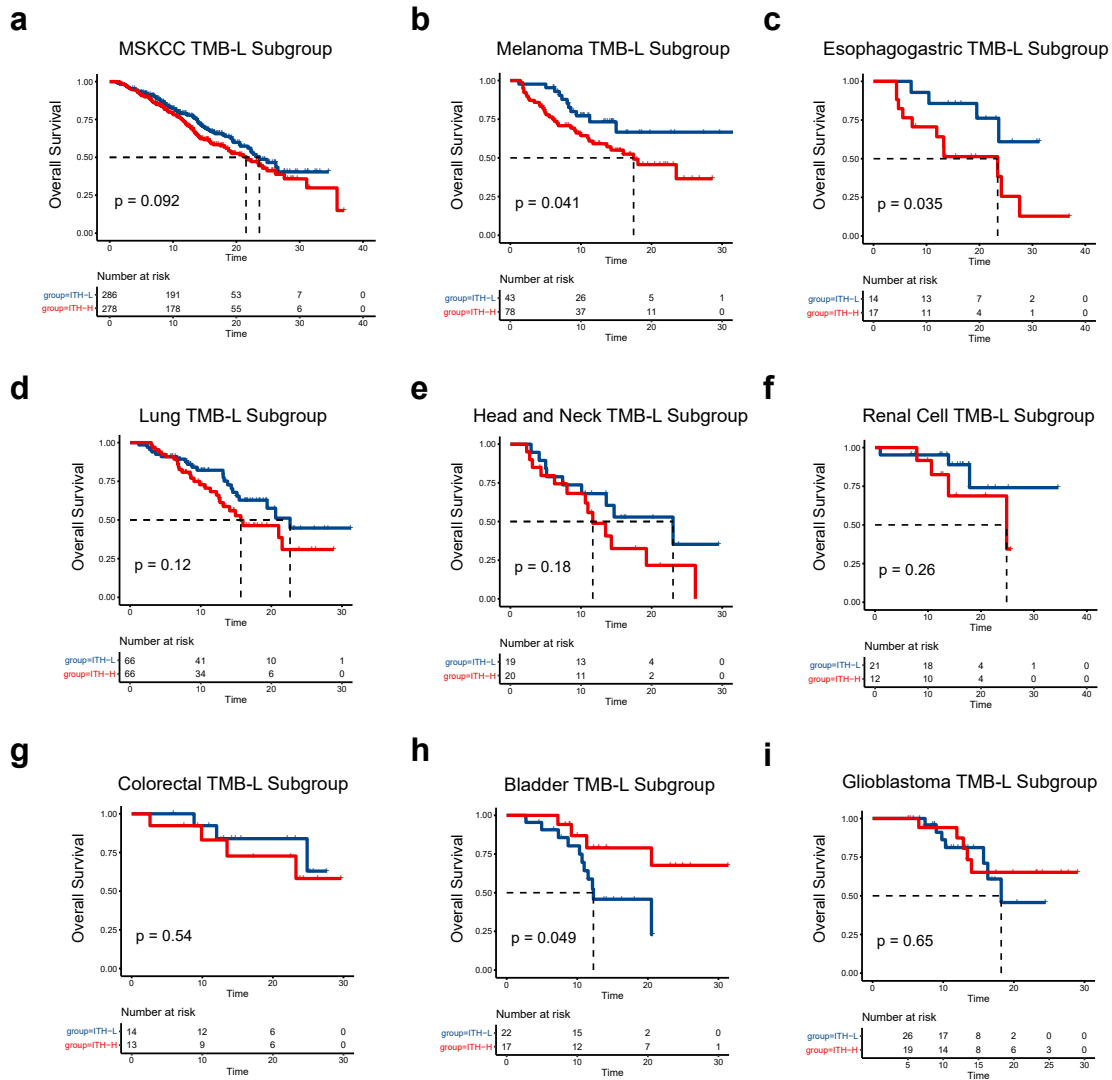

**Fig. S11. Overall survival analysis of ITH in TMB-L subgroup in MSKCC cohort. a,** Overall survival of ITH in all TMB-L patients. **b-i,** Overall survival of ITH in TMB-L patients in eight majority cancer types of MSKCC cohort, including Melanoma (**b**), Esophagogastric (**c**), Lung (**d**), Head and Neck (**e**), Renal Cell (**f**), Colorectal (**g**), Bladder (**h**) and Glioblastoma (**i**).

**Fig. S12.**

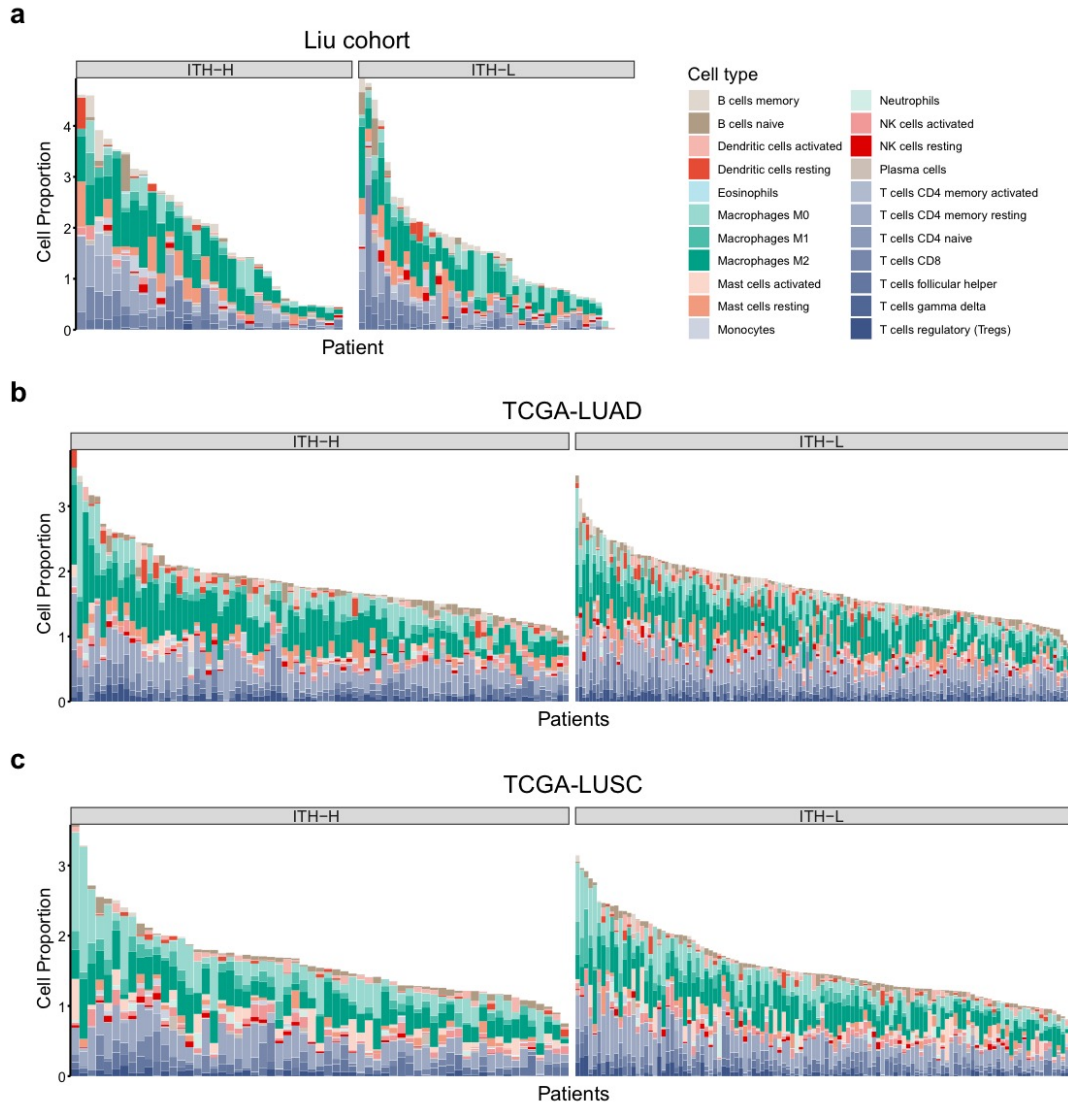

**Fig. S12. Tumor infiltrating lymphocytes analysis of different ITH groups. a-c,** Fraction of tumor infiltrating lymphocytes (TILs) of patients in ITH-H group and ITH-L group in Liu cohort (a), TCGA-LUAD (b) and TCGA-LUSC (c).

Fig. S13.

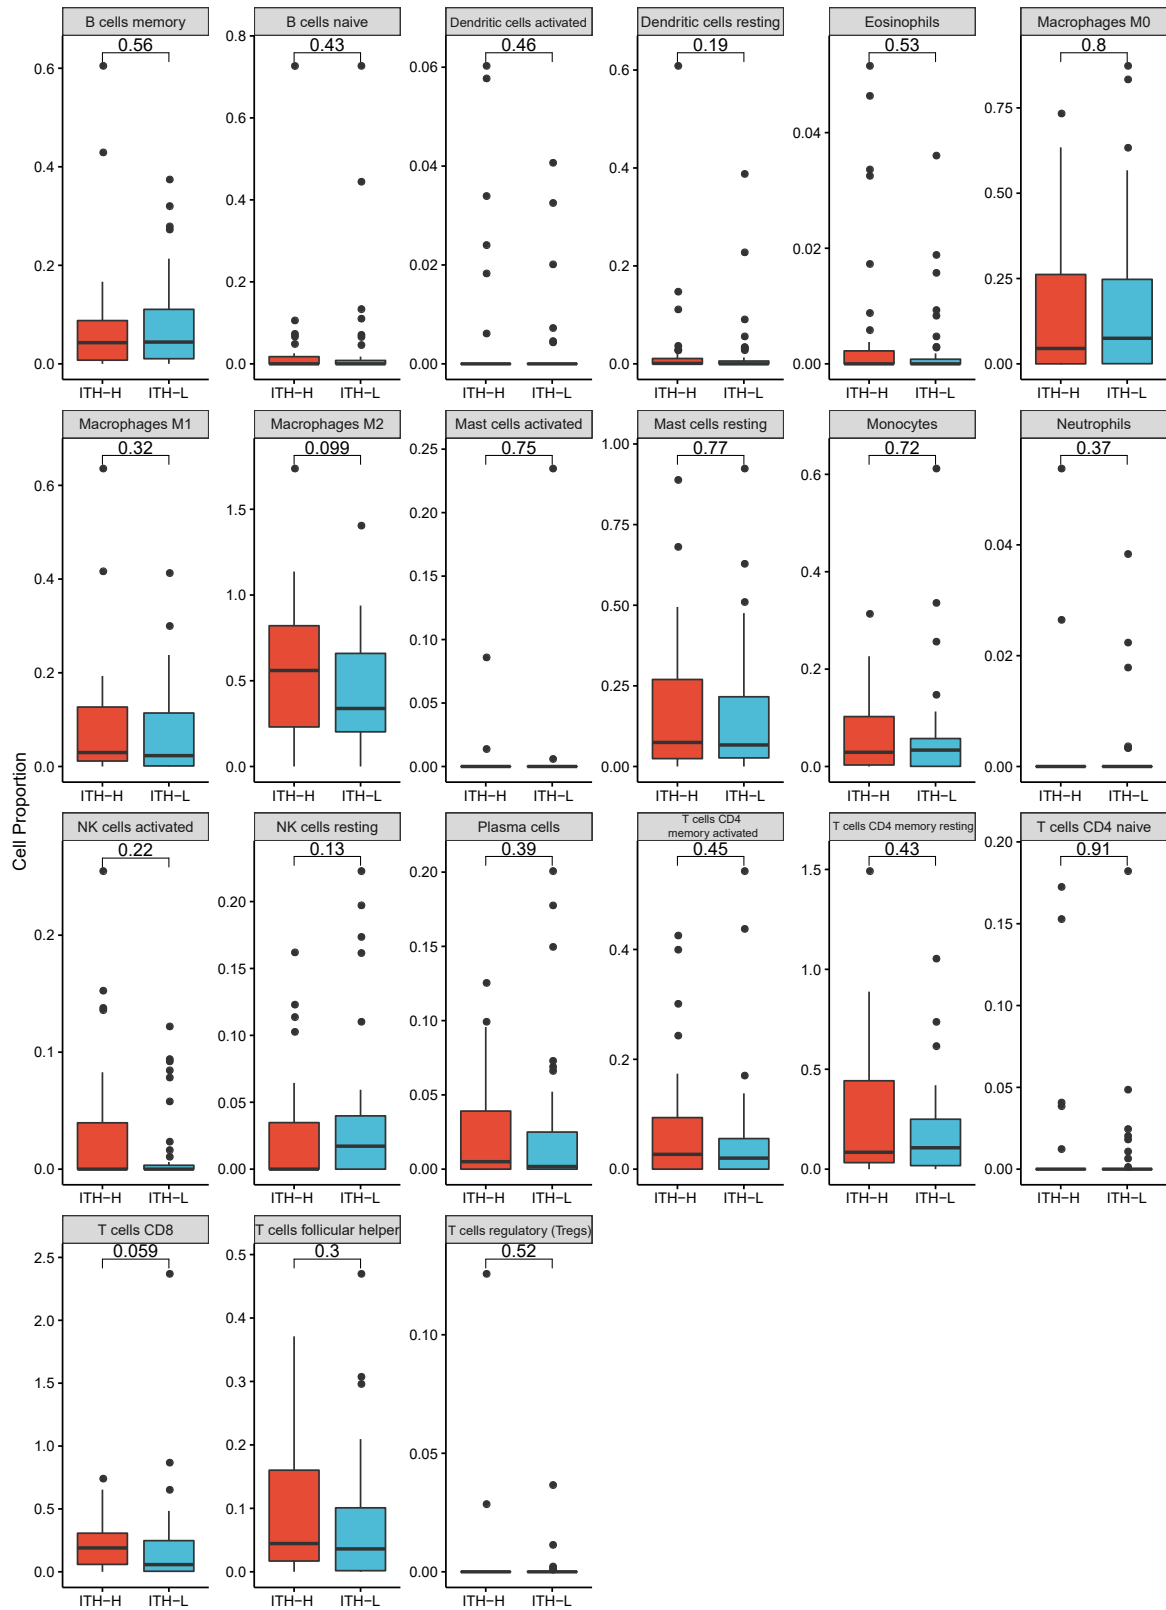



**Fig. S13. Difference of infiltration of each lymphocyte type in Liu cohort.** Difference of infiltration of each lymphocyte type between ITH-H group and ITH-L group in Liu cohort.

Fig. S14.

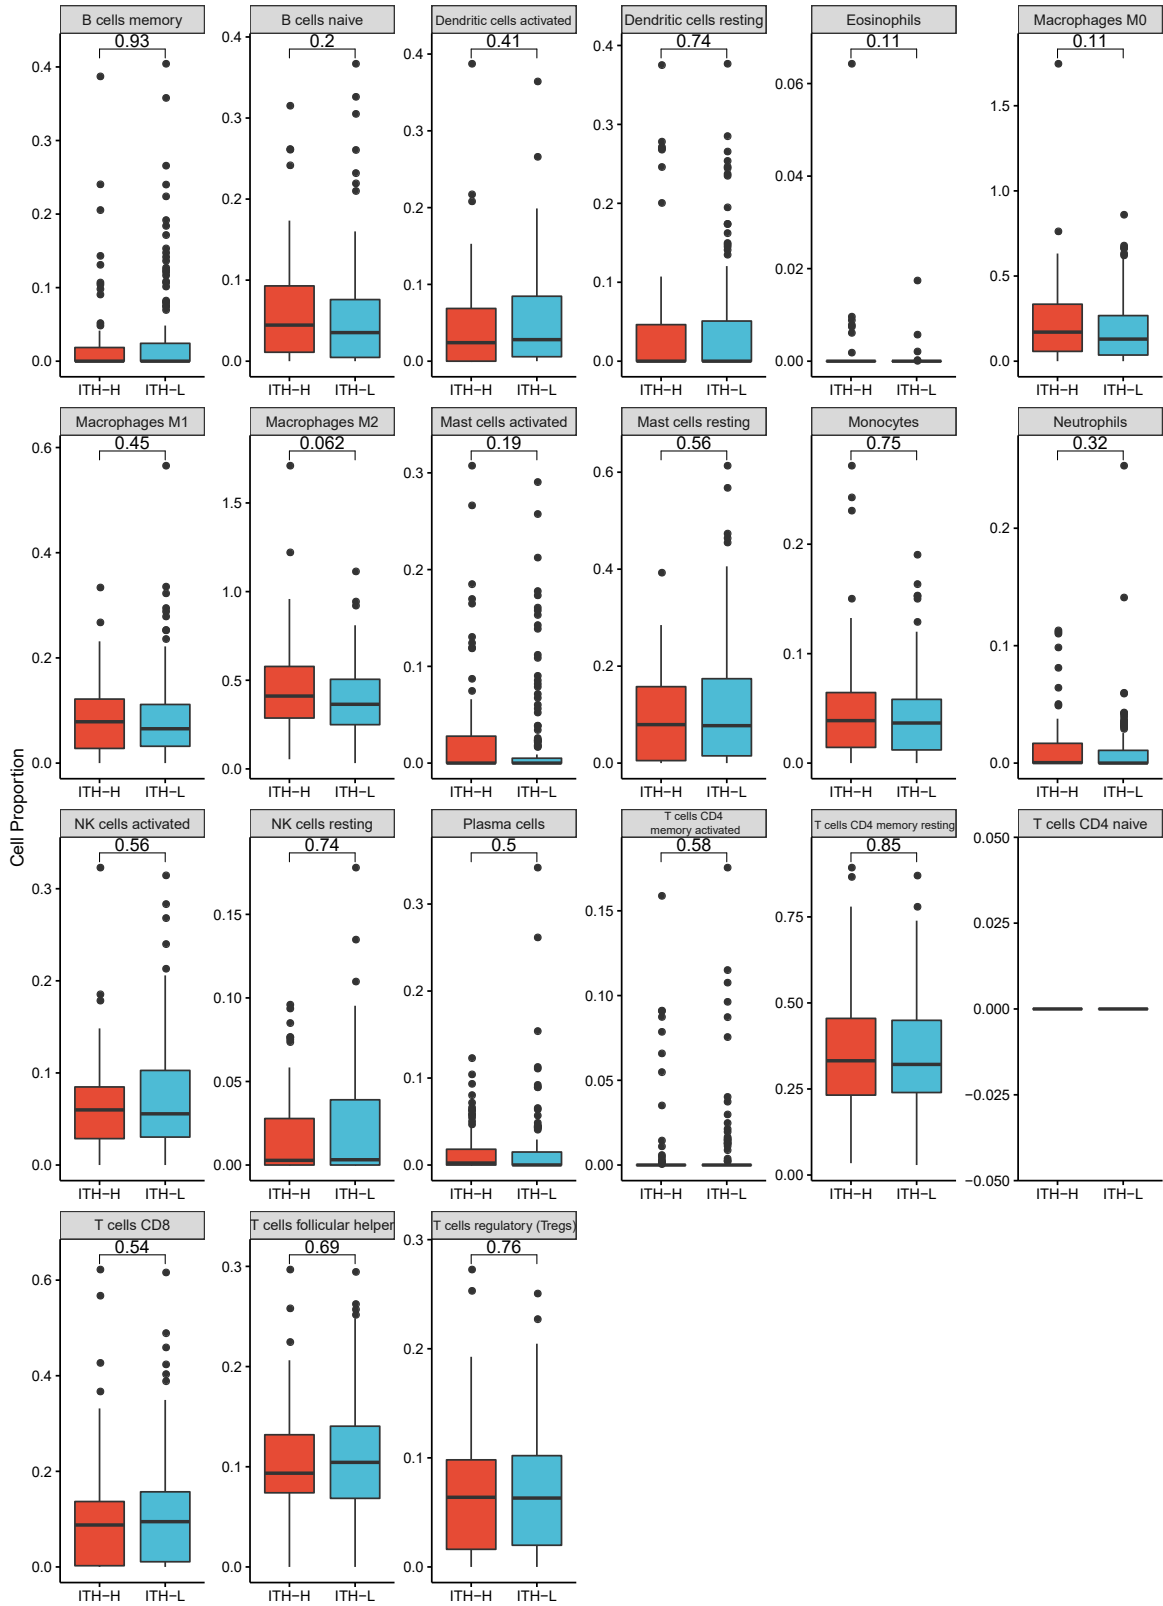

**Fig. S14. Difference of infiltration of each lymphocyte type in TCGA-LUAD.** Difference of infiltration of each lymphocyte type between ITH-H group and ITH-L group in TCGA-LUAD.

Fig. S15.

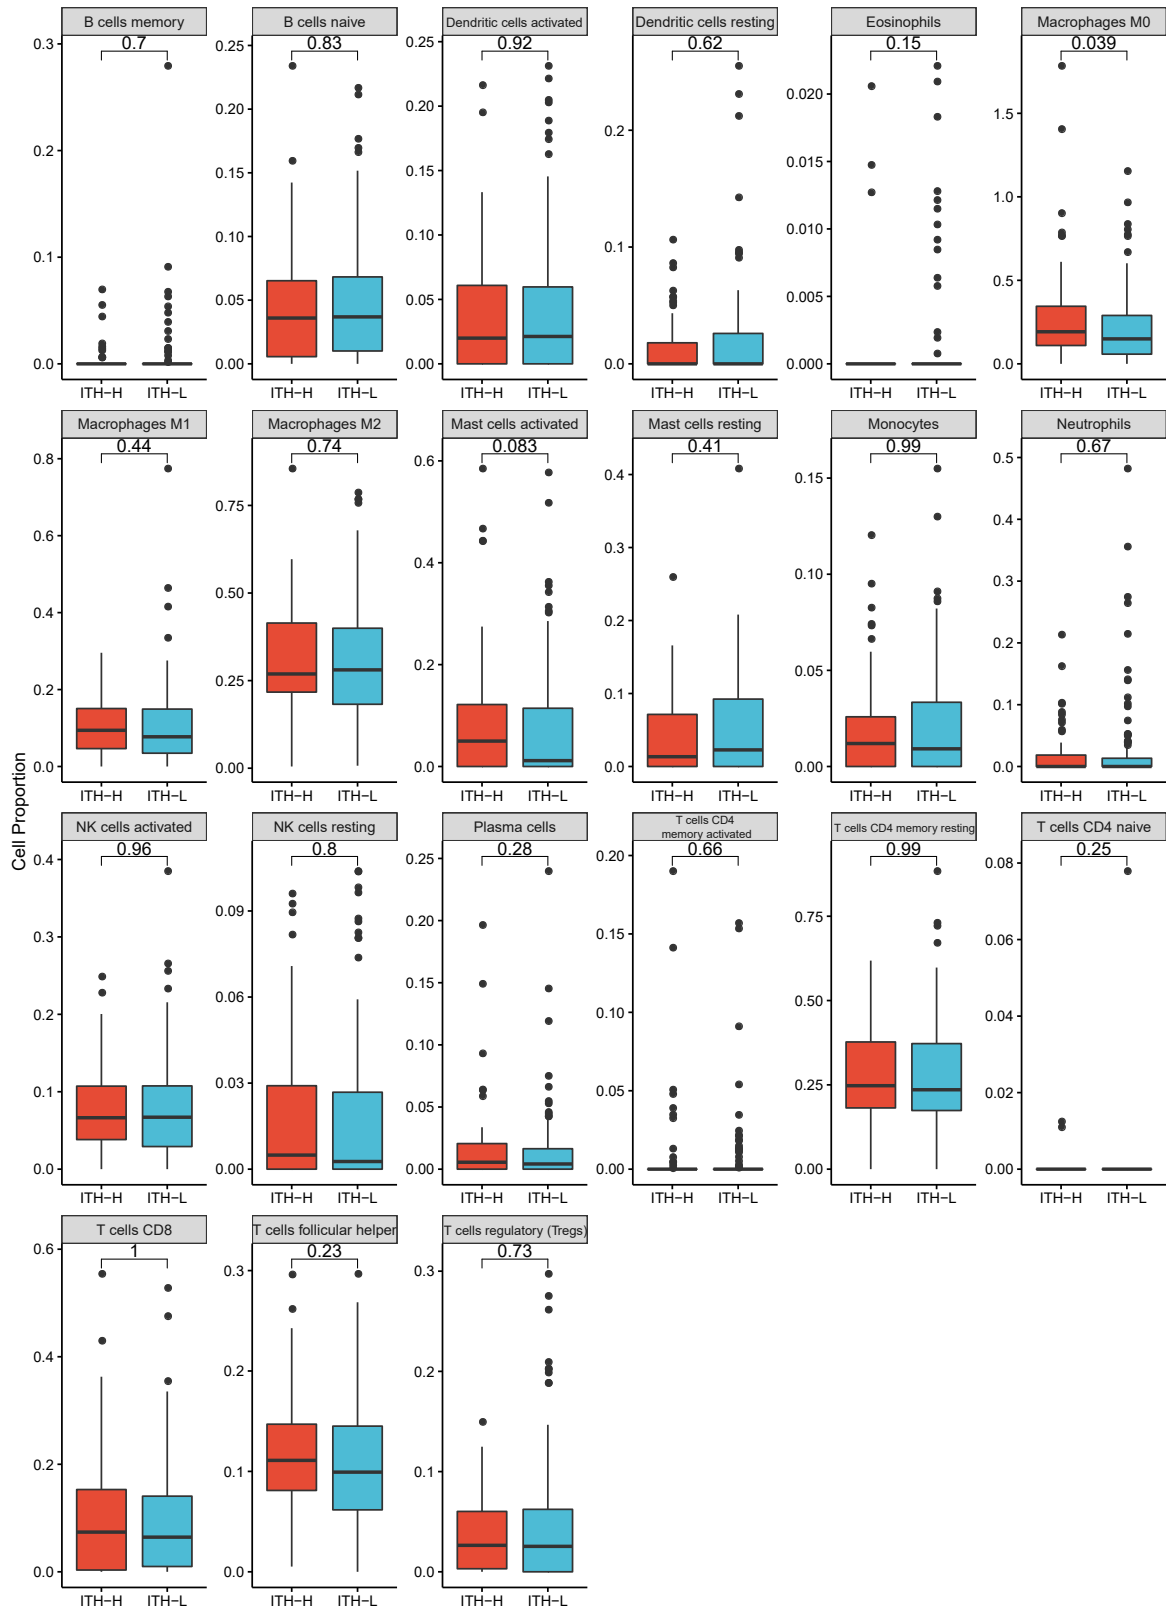

**Fig. S15. Difference of infiltration of each lymphocyte type in TCGA-LUSC.** Difference of infiltration of each lymphocyte type between ITH-H group and ITH-L group in TCGA-LUSC.

**Fig. S16.**

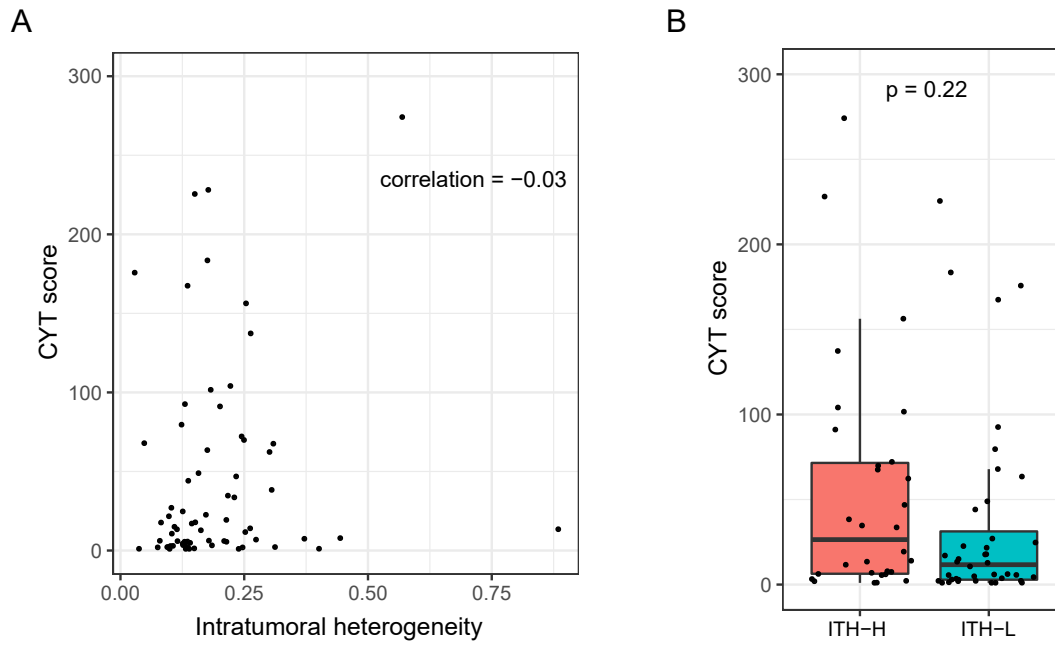

**Fig. S16. Relationship between Cytolytic Activity score and ITH.** **a**, Correlation between Cytolytic Activity (CYT) score and ITH value in Liu cohort. **b**, Distribution of CYT score of each patient between ITH-H group and ITH-L group in Liu cohort.
